# Supplementary material for: Potentiation of cerebellar Purkinje cells facilitates whisker reflex adaptation through increased simple spike activity
Source: eLife. 2018 Dec 18;7:e38852. doi: 10.7554/eLife.38852 (PMC6326726; doi:10.7554/eLife.38852)
Supplement: Figure 1—figure supplement 2—source data 1. [file elife-38852-fig1-figsupp2-data1.xlsx]

## Sheet: Sheet1
Dataset belonging to Figure 1 - figure supplement 2
Panel B (left inset)
Time (ms) until whisker reach baseline position again
Mouse nr	Front ipsi	Pre-pulse
1	33	20
2	47	22
3	41	28
4	58	28
5	46	23
6	45	30
7	28	28
8	53	24
9	56	26
Panel B (right inset)
Maximal protraction (°)
Mouse nr	Pre-pulse	Pulse
1	16.8138	15.8076
2	6.2391	2.4277
3	8.556	8.1072
4	4.3174	6.459
5	3.0376	2.7882
6	4.2264	5.2149
7	2.2527	3.2299
8	4.197	1.5983
9	4.2435	4.0973
Panel D
Maximal retraction (°) upon whisker stimulation
Mouse nr	Front ipsi	Front contra	Back ipsi	Front ipsi + PPI
1	16.1496	27.8572	17.0326	15.8076
2	5.0993	13.8916	5.0835	2.4277
3	11.346	22.3056	9.0817	8.1072
4	6.2057	15.9841	5.6911	6.459
5	2.1673	10.6666	3.9874	2.7882
6	10.0362	12.8027	13.4286	5.2149
7	3.5628	4.178	4.7954	3.2299
8	4.1565	11.0364	7.3124	1.5983
9	6.1023	11.7986	3.8202	4.0973
Note: The value for "Front ipsi + PPI" refers to the retraction upon the 2nd puff.
Panel E
Maximal protraction (°) upon whisker stimulation
Mouse nr	Front ipsi	Front contra	Back ipsi	Front ipsi + PPI
1	-3.1518	-2.2669	-1.7758	-2.1905
2	-2.0811	-1.7039	-0.6713	-1.5388
3	-3.0613	-1.7573	-1.1866	-2.3671
4	-3.7743	-2.3197	-0.7137	-1.6652
5	-1.2424	-0.9196	-0.1106	-1.0953
6	-4.846	-5.7416	-4.8435	-3.3289
7	-0.317	-0.474	-0.1841	-0.7937
8	-3.2723	-1.5395	-0.7072	-1.5014
9	-3.0461	-2.0533	0.0509	-2.3416
Note: The value for "Front ipsi + PPI" refers to the protraction upon the 2nd puff.
