# Supplementary material for: Potentiation of cerebellar Purkinje cells facilitates whisker reflex adaptation through increased simple spike activity
Source: eLife. 2018 Dec 18;7:e38852. doi: 10.7554/eLife.38852 (PMC6326726; doi:10.7554/eLife.38852)
Supplement: Figure 3—source data 1. [file elife-38852-fig3-data1.xlsx]

## Sheet: Sheet1
Dataset belonging to Figure 3
Panel D
Time intervals (in ms) between the time of the peak of the complex spike response and the moment of maximal difference between trials with and without complex spikes
PC nr.	Time interval
1	47
2	40
3	35
4	58
5	88
6	37
7	49
8	58
9	24
10	51
11	80
12	36
13	23
14	118
15	39
16	64
17	76
18	97
19	60
20	86
21	75
22	46
23	96
24	59
25	75
26	83
27	37
28	75
29	85
30	76
31	17
32	96
33	110
34	43
35	85
36	96
37	104
38	80
39	4
40	32
41	77
42	72
43	63
44	88
45	66
46	76
47	49
48	71
49	78
50	53
51	38
52	72
53	43
54	69
55	-4
Panel E
Changes in average whisker angle (°) during trials with and without a complex spike
	Change in angle
PC nr.	-200-0 ms	0-50 ms	50-150 ms
	a	b	c
1	-0.1449	0.4117	0.7188
2	-0.2243	-0.0344	0.3075
3	-0.0425	-0.3536	1.5056
4	-0.5253	-0.8405	1.6277
5	-0.1908	-0.0989	0.7463
6	0.2243	-0.0279	0.4365
7	0.4139	0.3879	1.2759
8	0.0757	0.1149	0.796
9	0.474	0.0465	0.3688
10	-0.4079	-0.6427	0.8223
11	0.004284	-0.8051	-2.9519
12	0.114	-0.2081	1.7759
13	-0.0385	0.268	-0.00087472
14	-0.2086	-0.0902	0.8052
15	0.2067	-0.3692	-1.1074
16	-0.4348	-0.1018	-0.9342
17	-0.7735	-1.978	5.8429
18	-0.2635	-1.2456	-1.2042
19	-0.6144	-2.1453	6.5297
20	-0.2406	-1.4401	4.3997
21	-0.0273	-0.6665	3.1873
22	-0.366	-2.7883	3.7004
23	0.000823	-0.9099	-3.4344
24	-0.2105	0.0584	-2.2136
25	-0.5269	-1.5596	7.4036
26	-0.4659	-0.1079	2.9193
27	-0.3847	-0.856	0.6909
28	-0.3523	0.2632	2.7458
29	-0.3694	-1.4482	10.4541
30	0.2555	0.142	-2.5657
31	-0.1315	1.3361	-1.7408
32	0.4499	0.9414	0.5507
33	-0.3203	-0.7546	-0.0892
34	-0.0356	-1.4953	2.8493
35	0.0465	0.5051	2.0697
36	-0.0554	-1.1001	4.8367
37	-0.3294	-0.1401	3.9263
38	-0.4787	-0.9508	3.0812
39	0.0052837	0.1191	1.2763
40	0.2214	0.3496	1.6017
41	0.0813	0.3434	0.5853
42	0.2323	-0.0651	3.0615
43	-0.6499	-0.4275	2.3608
44	-0.1136	-0.2266	1.6021
45	0.0656	0.6153	1.8774
46	-0.2995	-0.6613	1.7079
47	0.1392	0.2851	2.6187
48	0.39	0.4566	3.2559
49	0.0457	-0.2222	-0.9219
50	-0.0227	-0.4956	1.4476
51	0.0347	-0.297	0.0259
52	0.2621	-0.4157	0.0913
53	0.1535	0.4535	0.033
54	-0.0176	-0.8685	1.2881
55	0.0928	-0.9228	-0.1853
