# Supplementary material for: Potentiation of cerebellar Purkinje cells facilitates whisker reflex adaptation through increased simple spike activity
Source: eLife. 2018 Dec 18;7:e38852. doi: 10.7554/eLife.38852 (PMC6326726; doi:10.7554/eLife.38852)
Supplement: Figure 5—figure supplement 1—source data 1. [file elife-38852-fig2.xlsx]

## Sheet: Sheet1
Dataset belonging to Figure 5 - figure supplement 1
Panel B
Difference in timing (ms) of maximal correlation (R) between whisker position and instantaneous simple spike rate
(along the 45° line as depicted in the two panels at the left)
Mouse nr.	Change in time
1	-30
2	-210
3	-180
4	-70
5	-140
6	-110
7	-70
8	0
9	10
10	-40
11	-10
12	-120
13	-10
14	120
Panel D
Change in slope of linear regression lines between whisker angle and simple spike rate between pre- and post-inducition
Mouse nr.	Change in slope
1	0.117842
2	-0.0834727
3	0.539157
4	0.829913
5	0.158668
6	0.152759
7	-0.479748
8	0.563612
9	0.111442
10	-0.245139
11	-0.389309
12	0.222876
13	0.0260441
14	0.33561
