# Supplementary material for: Potentiation of cerebellar Purkinje cells facilitates whisker reflex adaptation through increased simple spike activity
Source: eLife. 2018 Dec 18;7:e38852. doi: 10.7554/eLife.38852 (PMC6326726; doi:10.7554/eLife.38852)
Supplement: Figure 5—figure supplement 2—source data 1. [file elife-38852-fig5-figsupp2-data1.xlsx]

## Sheet: Sheet1
Dataset belonging to Figure 5 - figure supplement 2
Panel G
Change in maximal protraction (%)				Change in maximal complex spike response (%)
				Change in simple spike response (during 0-200 ms interval after air puff) (%)
				Compared to 0.5 Hz stimulation.
Mouse nr.	Whiskers			PC nr.	CSs	SSs
1	-42.49			1	-35.3198	-2.99761
2	-84.3393			2	-42.602	3.63008
3	-41.3069			3	-53.1922	-9.13388
4	-62.3583			4	27.9659	2.71337
5	-61.6544			5	-25.8287	0.754094
6	-83.1695			6	-84.0288	-6.29438
7	-71.3677			7	-74.613	-5.63995
8	-58.2412			8	-57.619	50.382
9	-47.1014			9	-58.15	-13.424
10	-87.1737			10	-85.5435	5.66033
11	-88.888			11	25	-10.0636
12	-88.8612			12	-76.0166	-9.73628
13	-21.0156			13	-81.3838	8.64871
14	-62.0264			14	-56.5965	-3.65678
15	-79.0103			15	-79.534	7.14973
16	50.9658			16	-70.5813	26.6746
				17	-33.5278	-26.4894
				18	21.6977	-16.9099
				19	-75.7471	-9.86853
				20	-53.294	-16.0979
				21	-73.3233	-3.23858
				22	-58.9211	-4.13803
				23	-24.6432	8.69799
				24	-22.1935	14.6666
				25	-29.9012	10.6588
				26	-39.8678	-14.1728
				27	-19.2426	-3.53835
				28	-22.9853	-12.6493
				29	-60.9329	-21.0653
				30	-5.92401	-49.6761
				31	69.1422	-8.38132
				32	-78.3423	-15.9947
				33	-48.5036	-30.1041
				34	-81.231	-37.9934
				35	21.3352	19.1692
				36	-39.9479	-6.69183
				37	-64.8797	5.23346
				38	-73.6319	-16.9415
				39	-28.8873	-0.0692442
				40	28.6064	-3.23427
				41	-46.7121	-46.7728
				42	-45.1307	-41.7418
				43	-63.8306	2.9371
				44	127.21	7.11306
				45	-79.6913	-16.1834
				46	-11.6791	32.4702
				47	-44.5871	-12.4821
				48	-84.2015	17.4555
				49	-62.2367	-1.76161
				50	-45.6502	-44.5469
				51	-70.6534	36.0266
				52	-5.66505	34.8591
				53	-58.7317	0.041212
				54	-64.231	-9.95131
				55	108.722	-76.3696
