# Supplementary material for: Potentiation of cerebellar Purkinje cells facilitates whisker reflex adaptation through increased simple spike activity
Source: eLife. 2018 Dec 18;7:e38852. doi: 10.7554/eLife.38852 (PMC6326726; doi:10.7554/eLife.38852)
Supplement: Figure 5—figure supplement 3—source data 1. [file elife-38852-fig5-figsupp3-data1.xlsx]

## Sheet: Sheet1
Dataset belonging to Figure 5 - figure supplement 3
Panel C
Change in protraction (%)
Mouse nr	Change (%)
1	78.3635
2	184.105
3	100.955
4	108.849
5	403.823
6	29.1607
7	17.9628
8	157.847
9	91.9744
Panel D
Maximal change in complex spike response (%)
PC nr.	Change (%)
1	-86.5649
2	-32.9042
3	-97.6418
4	7.29595
5	-19.6502
6	-60.1522
7	-66.9274
8	-64.6721
9	-5.07074
10	-43.3305
11	-36.2499
12	-4.49371
13	21.0938
14	-3.36224
15	102.511
16	47.0104
17	-37.189
18	-19.2249
19	-46.6708
20	-56.6235
21	-62.2972
22	17.0452
23	-81.049
24	-78.5762
25	-45.4271
26	9.4339
27	-78.1896
Panel E
Maximal change in simple spike response (%)
PC nr.	Change (%)
1	-9.80392
2	-42.6829
3	7.14286
4	19.4915
5	5.47945
6	36.3636
7	15.4412
8	-7.54717
9	18
10	31.4607
11	-7.24638
12	29.8246
13	-0.512821
14	-34.0909
15	43.1579
16	36.7647
17	9.80392
18	12.2807
19	-13.9241
20	33.3333
21	8.4507
22	-2.66667
23	41.8182
24	35.4839
25	33.9623
26	-19.3548
27	88.8889
