# Supplementary material for: Potentiation of cerebellar Purkinje cells facilitates whisker reflex adaptation through increased simple spike activity
Source: eLife. 2018 Dec 18;7:e38852. doi: 10.7554/eLife.38852 (PMC6326726; doi:10.7554/eLife.38852)
Supplement: Figure 5—figure supplement 4—source data 1. [file elife-38852-fig5-figsupp4-data1.xlsx]

## Sheet: Sheet1
Dataset belonging to Figure 5 - figure supplement 4
Panel F (inset)
Maximal protraction (°)
Mouse nr	Air puff	LED
1	4.1754	23.3542
2	14.656	13.646
3	6.3373	17.6685
4	7.1281	19.3238
5	5.8221	9.3623
6	3.9695	18.8716
7	10.0216	18.2506
