# Supplementary material for: Potentiation of cerebellar Purkinje cells facilitates whisker reflex adaptation through increased simple spike activity
Source: eLife. 2018 Dec 18;7:e38852. doi: 10.7554/eLife.38852 (PMC6326726; doi:10.7554/eLife.38852)
Supplement: Figure 5—source data 1. [file elife-38852-fig5-data1.xlsx]

## Sheet: Sheet1
Dataset belonging to Figure 5
Panel B
Change in protraction (%)
Mouse nr	Change (%)
1	24.4593
2	39.9315
3	11.7003
4	0.4198
5	20.2619
6	16.7625
7	4.3939
8	27.9478
9	5.5473
10	-4.2717
11	22.8026
12	24.608
13	45.9186
14	12.9246
15	-5.1908
16	38.4471
Panel C
Maximal change in complex spike response (%)
PC nr.	Change (%)
1	-0.6002
2	-0.2925
3	0.194
4	0.0229
5	0.1546
6	-0.3503
7	-1.1508
8	-0.5208
9	0.4889
10	-0.5252
11	0.1961
12	-0.5977
13	-0.688
14	0.7938
15	-0.1284
16	0.5295
17	-0.0299
18	1.1351
19	-1.3966
20	0.019
21	0.1338
22	-0.2179
23	0.0971
24	-0.3129
25	0.6907
26	-0.242
27	0.2244
28	-0.128
29	-0.1151
30	-1.0568
31	-0.5551
32	-1.41
33	-0.3783
34	0.2865
35	-0.7108
36	-0.5247
37	0.0168
38	1.0955
39	-0.0765
40	-0.1158
41	0.0377
42	0.7328
43	-0.668
44	-0.3108
45	0.3163
46	-0.8114
47	0.1893
48	0.8573
49	0.5578
50	-0.372
51	-0.1514
52	-0.9362
53	-0.1238
54	1.4723
55	-0.2907
Panel D
Maximal change in simple spike response (%)
PC nr.	Change (%)
1	37.456
2	27.5685
3	37.672
4	33.0265
5	9.2976
6	17.6141
7	28.0213
8	19.5798
9	29.1233
10	21.1188
11	18.8744
12	42.6344
13	21.7573
14	23.9211
15	47.0068
16	54.3875
17	29.0872
18	51.1988
19	46.0069
20	35.9995
21	10.1965
22	37.942
23	29.6323
24	18.4477
25	46.4186
26	14.1529
27	3.4273
28	21.592
29	11.7375
30	28.0803
31	18.0002
32	32.6329
33	28.224
34	82.8479
35	31.6017
36	32.2516
37	15.8017
38	78.052
39	49.1209
40	13.4064
41	9.2556
42	30.1797
43	64.6406
44	74.6958
45	16.7641
46	11.5921
47	4.4203
48	26.4852
49	25.8832
50	37.0438
51	14.0175
52	45.1848
53	17.1255
54	16.451
55	44.0541
Panel F
Time interval of the maximal correlation (in ms)
Mouse nr.	Pre-ind.	Post-ind.
1	10	0
2	-20	-10
3	0	-40
4	0	-60
5	0	-40
6	0	-50
7	10	0
8	10	0
9	10	-40
10	-10	-20
11	0	-20
12	0	-10
13	-20	-20
14	120	-50
