# Supplementary material for: Potentiation of cerebellar Purkinje cells facilitates whisker reflex adaptation through increased simple spike activity
Source: eLife. 2018 Dec 18;7:e38852. doi: 10.7554/eLife.38852 (PMC6326726; doi:10.7554/eLife.38852)
Supplement: Figure 8—figure supplement 1—source data 1. [file elife-38852-fig4.xlsx]

## Sheet: Sheet1
Dataset belonging to Figure 8 - figure supplement 1
Panel B
Average complex spike frequency (Hz)
PC nr.	WT	L7-PP2B	L7-GluA3
1	0.5	2.325	1.0858
2	0.8155	1.675	0.639
3	1.2873	0.7613	0.5195
4	1.274	1.136	1.6918
5	1.251	1.0625	1.4206
6	1.3907	1.7949	1.227
7	1.3495	0.4242	1.227
8	1.8336	2.1257	0.622
9	0.9965	1.3075	1.3759
10	1.8361	0.757	1.3947
11	1.3641	0.9871	1.4842
12	1.1069	1.0379	1.1754
13	0.6807	1.078	1.1939
14	1.4336	0.9561	1.0412
15	0.2458	0.9297	0.8826
16	1.5017	0.5188	1.3318
17	1.6577	0.5635	0.2797
18	1.5895	1.5017	1.6562
19	0.9491	0.3935	1.1169
20	0.8326	0.6918	1.3441
21	1.5677	1.4817	0.4789
22	0.7022	0.6312	0.8211
23	0.87	0.6446	1.0296
24	1.6781	0.8338	0.4147
25	1.4418	1.8234	0.7571
26	1.3433	1.1866
27	1.1135	1.0107
28	0.9531	1.4363
29	0.9087	1.1607
30	1.4918	0.7146
31	0.9603	1.2258
32	0.6741	0.5062
33	1.6617	1.196
34	1.1718	0.7896
35	0.5689	1.4748
36	0.3977	0.5899
37	0.7208	1.2434
38	1.0121
39	0.5831
40	1.1341
41	0.8709
42	1.4251
43	1.1742
44	1.1593
45	1.7342
46	1.5438
47	0.7909
48	1.3571
49	1.3478
50	1.405
51	1.8806
52	2.2788
53	1.4186
54	1.6669
55	0.9602
56	1.544
57	1.3068
58	1.4143
59	1.6618
60	0.9596
61	1.6387
62	0.9374
63	0.62
64	0.8726
65	1.4
66	0.8742
67	2.2537
68	1.8145
69	2.0081
70	1.5081
71	1.654
72	1.5025
73	1.369
74	0.7855
75	1.6102
76	1.2975
77	0.2259
78	0.9459
79	1.4728
80	0.6669
81	1.8428
82	1.6564
83	1.6643
84	1.2851
85	1.4688
86	1.6022
87	1.4818
88	0.3564
89	1.6293
90	1.7684
91	0.588
92	1.6047
93	1.3946
94	1.408
95	0.7777
96	0.4014
97	1.4694
98	1.0323
99	1.8749
100	1.5749
101	1.6783
102	1.343
103	0.1542
104	1.6501
105	1.4074
106	0.8364
107	0.3585
108	1.4346
109	1.4618
110	1.5774
111	0.5923
112	1.3263
113	0.9761
114	1.1835
115	1.5545
116	1.6287
117	1.9164
118	2.0417
119	1.2391
120	1.3044
121	1.0528
122	1.1277
123	1.5426
124	1.2595
125	1.9771
126	1.4618
127	1.2204
128	1.0613
129	1.1741
130	1.875
131	1.4743
132	1.8026
133	1.1755
134	1.8073
135	0.298
136	1.5583
137	1.4622
138	0.6095
139	1.0732
140	1.0978
141	1.1275
142	1.1
143	1.0478
144	1.1583
145	0.5152
146	0.8045
147	0.7324
Panel C
Average simple spike frequency (Hz)
PC nr.	WT	L7-PP2B	L7-GluA3
1	100.544	83.545	72.5553
2	74.801	79.39	130.818
3	87.3313	47.2515	66.2754
4	77.923	49.3805	57.7427
5	72.5696	34.7146	84.1223
6	61.112	38.2157	125.91
7	67.8095	59.0473	98.8264
8	59.3651	41.6468	77.4483
9	145.573	38.4966	93.0869
10	47.9441	56.488	55.5949
11	85.7144	50.2242	90.9195
12	124.546	88.5813	66.0742
13	115.82	50.8635	96.0986
14	86.1946	44.4579	70.4982
15	104.621	58.2947	73.9572
16	70.609	58.3219	88.2047
17	39.2196	51.7246	115.235
18	35.0924	41.8698	36.2846
19	49.8236	51.3295	84.7804
20	54.235	92.5623	82.8178
21	97.1851	39.8767	12.1127
22	46.5289	48.8342	119.13
23	84.59	81.4545	94.7556
24	103.203	28.6478	190.106
25	47.2384	51.8757	90.9929
26	68.3768	58.9999
27	90.1789	41.2856
28	62.6985	50.6676
29	83.9778	59.9383
30	114.244	82.1935
31	130.471	44.273
32	87.113	56.0645
33	49.4583	68.9429
34	58.0669	96.7515
35	69.4091	43.341
36	89.2181	52.8705
37	116.803	75.8774
38	63.1806
39	44.9188
40	48.7691
41	71.9729
42	111.851
43	53.3798
44	90.8758
45	84.5805
46	64.3076
47	85.4884
48	101.888
49	121.942
50	96.08
51	78.4876
52	79.3054
53	71.4486
54	97.9408
55	62.8209
56	86.3448
57	39.8601
58	55.8619
59	99.7766
60	73.12
61	30.987
62	91.7247
63	149.255
64	61.1635
65	75.8634
66	26.1245
67	66.8408
68	57.5323
69	109.375
70	87.4637
71	72.5139
72	160.1
73	90.6918
74	127.906
75	92.1337
76	53.8903
77	74.1104
78	100.248
79	76.3415
80	101.207
81	91.4296
82	53.1311
83	56.6686
84	78.0566
85	74.3392
86	41.1138
87	89.6423
88	131.623
89	94.1511
90	46.1801
91	52.4368
92	67.4447
93	66.4613
94	130.563
95	49.0112
96	78.5927
97	130.241
98	85.7674
99	68.6847
100	72.5205
101	92.0857
102	139.209
103	51.0498
104	83.4549
105	108.876
106	51.93
107	123.175
108	72.9086
109	103.014
110	33.658
111	104.128
112	101.658
113	90.6721
114	102.05
115	74.268
116	113.771
117	71.7205
118	82.7829
119	92.2603
120	70.0934
121	75.2759
122	94.1198
123	71.1154
124	59.6241
125	31.9014
126	65.0401
127	71.13
128	71.2498
129	56.2787
130	49.7563
131	81.9535
132	62.7145
133	68.0231
134	25.6906
135	11.9098
136	67.7635
137	56.8933
138	120.986
139	65.8594
140	113.521
141	143.151
142	61.877
143	80.9442
144	88.5645
145	83.3535
146	100.353
147	62.0294
Panel D
Median CV2 values
PC nr.	WT	L7-PP2B	L7-GluA3
1	0.1477	0.3189	0.3445
2	0.2948	0.3163	0.2237
3	0.2886	0.1551	0.3133
4	0.2478	0.134	0.5637
5	0.2492	0.1106	0.2957
6	0.3529	0.1239	0.234
7	0.3722	0.1691	0.4488
8	0.3833	0.2052	0.4309
9	0.1778	0.1405	0.4751
10	0.6199	0.3191	0.389
11	0.2743	0.1441	0.4299
12	0.128	0.1426	0.6382
13	0.2554	0.3863	0.5187
14	0.2184	0.1122	0.5536
15	0.2211	0.1803	0.4237
16	0.3283	0.5492	0.4959
17	0.4196	0.5313	0.3388
18	0.4031	0.2562	0.5157
19	0.3165	0.256	0.4403
20	0.414	0.2326	0.3299
21	0.3927	0.2697	0.4571
22	0.3013	0.2461	0.3943
23	0.1681	0.2633	0.4516
24	0.2369	0.3107	0.1822
25	0.3853	0.2432	0.3648
26	0.2287	0.2577
27	0.3148	0.2744
28	0.3821	0.2456
29	0.4556	0.2412
30	0.1648	0.2005
31	0.0905	0.306
32	0.39	0.3512
33	0.4023	0.1992
34	0.5547	0.1959
35	0.2276	0.3547
36	0.2048	0.3845
37	0.1595	0.1986
38	0.2968
39	0.3107
40	0.4104
41	0.2831
42	0.2051
43	0.2802
44	0.3409
45	0.2659
46	0.3403
47	0.3051
48	0.2449
49	0.2792
50	0.3416
51	0.367
52	0.2619
53	0.3452
54	0.3137
55	0.4459
56	0.368
57	0.6045
58	0.4038
59	0.2641
60	0.271
61	0.5565
62	0.2921
63	0.2375
64	0.3776
65	0.4464
66	0.5286
67	0.4293
68	0.5098
69	0.4183
70	0.5049
71	0.3868
72	0.3319
73	0.3295
74	0.3398
75	0.4496
76	0.487
77	0.3771
78	0.3837
79	0.4624
80	0.3854
81	0.4033
82	0.5123
83	0.5201
84	0.4524
85	0.4531
86	0.5665
87	0.5243
88	0.2488
89	0.4875
90	0.3882
91	0.4197
92	0.3215
93	0.4345
94	0.3562
95	0.4621
96	0.3958
97	0.3404
98	0.3198
99	0.4053
100	0.3053
101	0.4751
102	0.3047
103	0.5162
104	0.451
105	0.3787
106	0.4442
107	0.3586
108	0.3681
109	0.3682
110	0.4008
111	0.1725
112	0.32
113	0.3273
114	0.2552
115	0.238
116	0.2333
117	0.2709
118	0.3837
119	0.2708
120	0.2967
121	0.277
122	0.2449
123	0.3521
124	0.2524
125	0.2941
126	0.3102
127	0.265
128	0.489
129	0.2642
130	0.3261
131	0.1411
132	0.3609
133	0.4195
134	0.581
135	0.5885
136	0.6192
137	0.6835
138	0.4148
139	0.6136
140	0.3251
141	0.2428
142	0.4475
143	0.4875
144	0.3788
145	0.4276
146	0.3466
147	0.448
Panel F
Maximal complex spike response (%)
PC nr.	WT	L7-PP2B	L7-GluA3
1	2.1	0.9721	0.0697
2	2.7597	2.044	0.1041
3	2.7886	0.2659	0.841
4	2.8005	0.8347	0.0782
5	2.9712	0.6056	1.5404
6	3.1634	0.8391	0.8542
7	3.4026	1.2366	1.2152
8	3.44	1.7861	1.1649
9	3.5628	0.2077	0.5434
10	4.2721	1.915	1.5177
11	5.1094	0.7138	0.5469
12	5.6178	1.1788	0.7138
13	6.1917	0.3754	1.313
14	8.3039	0.5689	0.7249
15	0.22	2.5818	2.8636
16	0.2389	1.7942	0.5996
17	0.5121	1.9514	1.2304
18	0.5438	2.5733	0.9514
19	0.548	1.3877	1.5604
20	0.5921	0.4578
21	0.6275	0.7849
22	0.6389	1.7988
23	0.6697	1.0927
24	0.7065	0.9494
25	0.8243	0.4749
26	0.916	2.7504
27	0.9457	5.8776
28	0.9783	2.0798
29	0.9835	0.5428
30	0.9931	1.6007
31	1.0002	0.4061
32	1.0296	0.5403
33	1.0892	0.4571
34	1.1014	0.2226
35	1.1383
36	1.2614
37	1.2931
38	1.3407
39	1.3631
40	1.4741
41	1.5726
42	1.63
43	1.6632
44	1.72
45	1.8126
46	1.83
47	1.2032
48	1.5288
49	0.4603
50	2.0969
51	0.7168
52	0.5203
53	0.3826
54	1.3583
55	0.4592
56	0.4039
57	1.9457
58	0.9536
59	0.6647
60	2.644
61	2.6626
62	1.2731
63	2.8192
64	1.6783
65	5.6476
66	1.0327
67	2.2256
68	0.9127
69	0.7538
70	3.32
71	1.5698
72	0.5532
73	2.1448
74	1.6912
75	1.6498
76	0.835
77	0.7053
78	1.3839
79	4.0506
80	1.9529
81	0.7849
82	0.547
83	0.5576
84	1.8497
85	0.5692
86	2.75
87	2.5352
88	2.6662
89	3.0635
90	1.1452
91	0.2525
92	1.0781
93	0.4279
94	0.1466
95	0.6191
96	1.4038
97	1.4384
98	0.3654
99	0.8401
100	0.4852
101	2.6021
102	1.6605
103	5.9379
104	3.7468
105	4.119
106	3.4278
107	1.6285
108	0.9836
109	2.642
110	1.3599
111	4.2889
112	4.4974
113	1.6005
114	3.0157
115	3.8638
116	2.8107
117	1.0515
118	0.8424
119	5.3675
120	3.0093
121	0.3271
122	0.0469
123	0.2486
124	0.3347
125	0.0297
126	1.1525
127	0.1202
128	0.0968
129	0.667
Panel G
Time to peak complex spike response (ms)
PC nr.	WT	L7-PP2B	L7-GluA3
1	99	62	46
2	46	26	33
3	38	49	51
4	34	37	106
5	16	75	93
6	25	62	35
7	47	41	40
8	34	41	41
9	29	183	40
10	34	50	37
11	27	58	52
12	33	37	178
13	35	102	62
14	24	198
15	61	41
16	67	41
17	24	36
18	54	42
19	107	31
20	39	14
21	42	51
22	42	50
23	38	41
24	60	53
25	14	39
26	41	33
27	102	27
28	45	53
29	17	38
30	37	43
31	89	49
32	32	35
33	162	141
34	46	4
35	59
36	32
37	34
38	37
39	39
40	85
41	54
42	55
43	50
44	36
45	49
46	41
47	38
48	53
49	129
50	56
51	134
52	15
53	207
54	36
55	272
56	212
57	58
58	42
59	35
60	40
61	39
62	35
63	37
64	28
65	25
66	44
67	45
68	18
69	139
70	23
71	38
72	71
73	49
74	26
75	51
76	36
77	63
78	67
79	35
80	39
81	95
82	2
83	41
84	36
85	113
86	37
87	35
88	64
89	36
90	63
91	83
92	35
93	67
94	300
95	26
96	37
97	33
98	141
99	88
100	269
101	39
102	57
103	33
104	36
105	35
106	36
107	38
108	118
109	32
110	37
111	40
112	30
113	39
114	39
115	29
116	42
117	39
118	39
119	34
120	35
121	46
122	106
123	93
124	35
125	40
126	41
127	40
128	37
129	52
Panel I
Simple spike modulation (%)
PC nr.	WT	L7-PP2B	L7-GluA3
1	138	172	191.921
2	148.074	57	136.386
3	152	46	168.201
4	9.6216	4.89	43.8925
5	17	68	63.0673
6	39.2367	31	225.387
7	47.5983	70	297.086
8	70	49	148.151
9	89.4671	0.3	125.238
10	62.0742	164	75.8014
11	5.3	17	66.7642
12	23	48	157.385
13	29	199.8	112.954
14	32	57	128.783
15	33	7	108.218
16	38.0256	5.4246	87.7673
17	39	9.5759	44.8036
18	45.2326	25.536	5.1452
19	54.7431	125.364	38.5198
20	60	5.1556	113.735
21	63	10.5965	4.7908
22	63	1.4533	136.533
23	64	16.314	36.6814
24	65	5.3333	64.9304
25	76	53.2945	104.269
26	80	67.8089
27	82	18.399
28	84	4.7106
29	85	27.9071
30	86	57.5488
31	88.9176	20.8276
32	130	41.2435
33	118.547	19.5937
34	120.132	40.2755
35	123	152.162
36	125
37	138.053
38	140
39	142
40	151
41	156
42	160
43	168
44	168
45	169.953
46	199.69
47	55.6046
48	124.827
49	111.661
50	17.8615
51	85.7291
52	81.8841
53	178.701
54	111.864
55	73.7516
56	148.028
57	163.111
58	145.078
59	134.494
60	139.707
61	19.6
62	148.852
63	192.603
64	62.751
65	161.068
66	150
67	188.31
68	79.1267
69	26.6694
70	117.148
71	169.301
72	242.409
73	131.565
74	129.319
75	148.685
76	144.743
77	70.7894
78	183.821
79	81.4046
80	171.143
81	56.7649
82	59.5859
83	122.278
84	79.2661
85	154.007
86	196.631
87	2.0817
88	175.687
89	52.8255
90	125.708
91	152.337
92	241.492
93	78.9241
94	145.99
95	140.311
96	69.2324
97	119.46
98	44.9537
99	84.9983
100	118.254
101	135.797
102	117.495
103	14.9119
104	86.0555
105	44.0739
106	152.587
107	58.3629
108	79.8226
109	46.7042
110	38.0771
111	59.4682
112	58.8073
113	18.1571
114	73.2476
115	134.599
116	8.8329
117	24.6897
118	55.682
119	130.715
120	236.638
121	30.5301
122	44.7782
Panel J
Time to maximal simple spike response (ms)
PC nr.	WT	L7-PP2B	L7-GluA3
1	26	24	33
2	28	59	19
3	18	40	47
4	35	23	80
5	23	50	34
6	36	60	41
7	49	20	66
8	15	24	33
9	20	24	27
10	20	60	38
11	16	51	28
12	21	45	32
13	20	37	52
14	31	17	46
15	20	56	33
16	19	52
17	15	60
18	37	46
19	26	45
20	22	59
21	22	60
22	57	58
23	24	60
24	19	57
25	59	26
26	29	47
27	62	47
28	22	45
29	38	44
30	22	22
31	12	59
32	26	47
33	29	52
34	38	54
35	18	36
36	70
37	59
38	57
39	64
40	22
41	47
42	27
43	30
44	68
45	14
46	39
47	33
48	33
49	37
50	59
51	31
52	53
53	30
54	37
55	27
56	25
57	36
58	27
59	22
60	30
61	60
62	39
63	60
64	23
65	59
66	18
67	42
68	23
69	27
70	35
71	59
72	60
73	27
74	30
75	14
76	43
77	39
78	28
79	25
80	38
81	20
82	39
83	29
84	22
85	36
86	29
87	34
88	29
89	28
90	58
91	28
92	48
93	40
94	60
95	45
96	41
97	59
98	34
99	38
100	35
101	32
102	25
103	60
104	34
105	21
106	28
107	19
108	32
109	27
110	21
111	26
112	23
113	27
114	32
115	21
116	29
117	29
118	47
119	31
120	59
121	23
122	42
