# Supplementary material for: Potentiation of cerebellar Purkinje cells facilitates whisker reflex adaptation through increased simple spike activity
Source: eLife. 2018 Dec 18;7:e38852. doi: 10.7554/eLife.38852 (PMC6326726; doi:10.7554/eLife.38852)
Supplement: Figure 8—figure supplement 2—source data 1. [file elife-38852-fig5.xlsx]

## Sheet: Sheet1
Dataset belonging to Figure 8 - figure supplement 2
Maximal protraction (in °)
Mouse nr.	WT	L7-PP2B	L7-GluA3
1	5.5181	4.8936	15.217
2	3.0369	4.6213	7.4437
3	15.4119	13.921	18.1145
4	18.1527	8.2432	4.1452
5	9.4867	7.5964	6.6954
6	10.3978	9.6471	0.5829
7	6.2331	9.6788
8	12.1405	16.3999
9	15.0461	11.3432
10	11.8859	4.3286
11	9.9643	1.9679
12	13.848	8.3836
13	3.1625	9.8094
14	3.6173
15	6.8885
16	6.8129
