# Supplementary material for: Potentiation of cerebellar Purkinje cells facilitates whisker reflex adaptation through increased simple spike activity
Source: eLife. 2018 Dec 18;7:e38852. doi: 10.7554/eLife.38852 (PMC6326726; doi:10.7554/eLife.38852)
Supplement: Figure 8—source data 1. [file elife-38852-fig8-data1.xlsx]

## Sheet: Sheet1
Dataset belonging to Figure 8
Panel C
Change in average angle of the whiskers during the 0-120 ms interval after the air puff (%)
Mouse nr.	WT	L7-PP2B	L7-GluA3
1	1.5845	-0.3788	-0.1234
2	0.1504	0.2418	-1.1292
3	0.0279	0.6718	-0.3455
4	0.5153	-0.5067	-0.3062
5	0.0475	-0.226	0.6878
6	1.2103	1.0325	-0.7357
7	0.0347	-0.47
8	1.5707	0.5535
9	0.5946	-1.6534
10	1.0619	-0.0492
11	2.5199	0.0402
12	0.6986	-1.0976
13	0.4223	-0.7198
14	0.349
15	0.5006
16	1.0125
Panel F
Maximal change in simple spike rate (%)
PC nr.	WT	L7-PP2B	L7-GluA3
1	5.0868	11.4504	-12.1212
2	30.2401	-3.202	-1.1494
3	8.6253	-18.1287	-2.3297
4	3.2538	-2.346	-10.7325
5	9.4949	-5.5556	-5.7263
6	3.6466	-5.7831	-6.4732
7	2.2609	-13.7255	4.6332
8	61.2426	7.2072	4.4379
9	7.9904	-5.7592	21.3358
10	20.3105	-1.1696	-24.5161
11	15.5743	0.6977	-8.9021
12	-18.6567	5.6497	-14.3695
13	5.042	6.1224	-9.1085
14	17.2799	4.9505
15	-1.7723	-0.6803
16	12.272	-10.3571
17	-6.4828	-15.9091
18	3.4773	7.1429
19	7.5544	8.1699
20	8.761	5.9028
21	29.0803	24.8031
22	3.2909	7.6923
23	-10.1449	-2.2222
24	15.0313
25	-1.9444
26	19.7889
27	-17.5
28	-7.0539
29	28.7542
30	9.4595
31	13.5191
32	-0.8209
33	5.2045
34	8.8403
35	14.3838
Note: only PCs with a "weak CS response" were included,
as "strong responders" did not show SS potentiation (see Fig. 9).
