# Supplementary material for: Potentiation of cerebellar Purkinje cells facilitates whisker reflex adaptation through increased simple spike activity
Source: eLife journal article supplement (doi:10.7554/elife.38852), 2018-12-18
Supplement: supp [file elife-38852-supp-v1.zip]

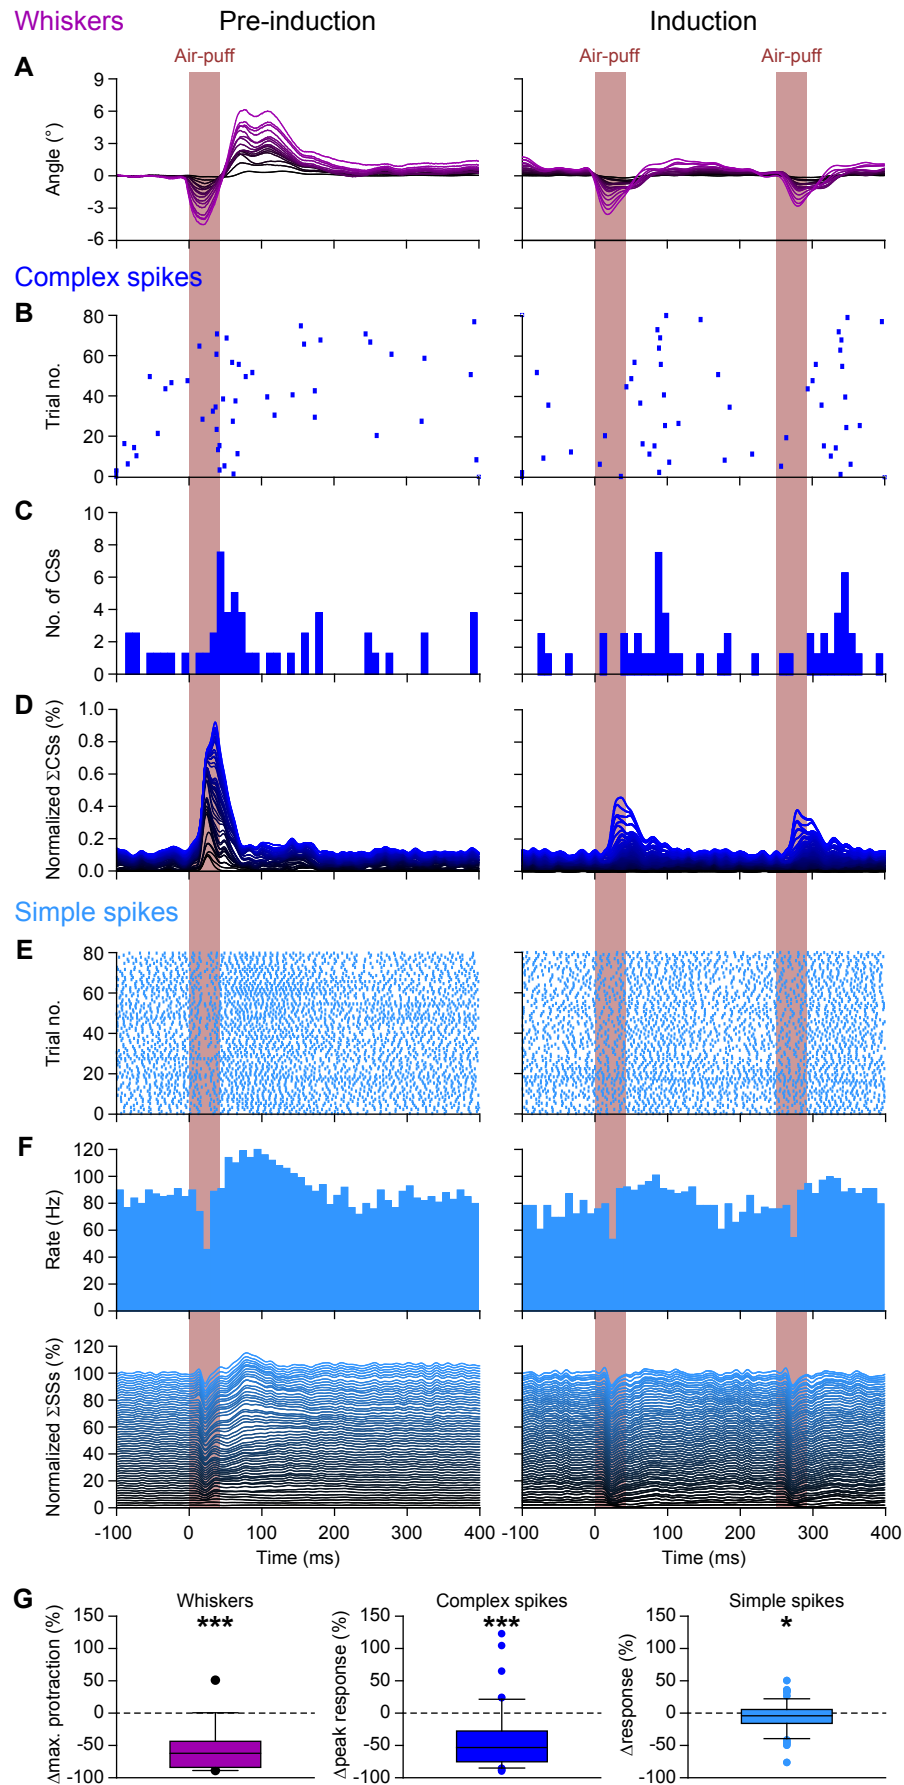

**Figure 5 - figure supplement 2 | Purkinje cell responses during 4 Hz air-puff stimulation**

**A.** Normalized stacked line plots showing the whisker movement in 16 mice during the pre-induction block (100 trials; left) and during the induction block (80 trials; right). The retraction, caused by the air flow, is largely intact, but the subsequent touch-induced whisker protraction is largely reduced during 4 Hz stimulation as compared to 0.5 Hz stimulation during the pre-induction block. **B.** Raster plots of the complex spike responses to whisker pad air-puff stimulation

during the first 80 trials of a pre-induction block and during the 80 trials of the induction block with the accompanying peri-stimulus time histograms (**C**). **D.** Normalized stacked line plots show that the rate of complex spike responses is reduced upon a higher stimulation frequency ( $n = 55$ ). **E-F.** The same for the simple spike response. **G.** Box plots showing the decreased whisker, complex spike peak response and simple spike firing modulation the first 200 ms after puff onset. \*  $p < 0.05$ ; \*\*\*  $p < 0.001$  (Wilcoxon matched-pairs test). See also Source Data File.
