# Supplementary material for: Potentiation of cerebellar Purkinje cells facilitates whisker reflex adaptation through increased simple spike activity
Source: eLife journal article supplement (doi:10.7554/elife.38852), 2018-12-18
Supplement: supp [file elife-38852-supp-v1.zip]

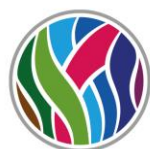

## eLife's transparent reporting form

We encourage authors to provide detailed information *within their submission* to facilitate the interpretation and replication of experiments. Authors can upload supporting documentation to indicate the use of appropriate reporting guidelines for health-related research (see [EQUATOR Network](#)), life science research (see the [BioSharing Information Resource](#)), or the [ARRIVE guidelines](#) for reporting work involving animal research. Where applicable, authors should refer to any relevant reporting standards documents in this form.

If you have any questions, please consult our Journal Policies and/or contact us: [editorial@elifesciences.org](mailto:editorial@elifesciences.org).

### Sample-size estimation

- You should state whether an appropriate sample size was computed when the study was being designed
- You should state the statistical method of sample size computation and any required assumptions
- If no explicit power analysis was used, you should describe how you decided what sample (replicate) size (number) to use

Please outline where this information can be found within the submission (e.g., sections or figure legends), or explain why this information doesn't apply to your submission:

See "Statistical analysis" in the Materials and Methods section.

### Replicates

- You should report how often each experiment was performed
- You should include a definition of biological versus technical replication
- The data obtained should be provided and sufficient information should be provided to indicate the number of independent biological and/or technical replicates
- If you encountered any outliers, you should describe how these were handled
- Criteria for exclusion/inclusion of data should be clearly stated
- High-throughput sequence data should be uploaded before submission, with a private link for reviewers provided (these are available from both GEO and ArrayExpress)

Please outline where this information can be found within the submission (e.g., sections or figure legends), or explain why this information doesn't apply to your submission:

1. The definition of replicates is given in the "Statistical analysis" paragraph in the Methods section.
2. For each test, the number of replicates is stated in the Results section and/or the relevant Figure legends. In addition, three supplementary tables contain additional statistical information, inclusion of which in the Results section would compromise the legibility of the text.
3. Criteria for exclusion of data are stated in the "Statistical analysis" paragraph in the Materials and Methods section [implying that outliers were included].



### Statistical reporting

- Statistical analysis methods should be described and justified
- Raw data should be presented in figures whenever informative to do so (typically when N per group is less than 10)
- For each experiment, you should identify the statistical tests used, exact values of N, definitions of center, methods of multiple test correction, and dispersion and precision measures (e.g., mean, median, SD, SEM, confidence intervals; and, for the major substantive results, a measure of effect size (e.g., Pearson's  $r$ , Cohen's  $d$ ))
- Report exact  $p$ -values wherever possible alongside the summary statistics and 95% confidence intervals. These should be reported for all key questions and not only when the  $p$ -value is less than 0.05.

Please outline where this information can be found within the submission (e.g., sections or figure legends), or explain why this information doesn't apply to your submission:

1. All statistical tests are named when they appear in the text / figures. Justification, mainly regarding the use of parametric vs. non-parametric tests, is given in the "Statistical analysis" paragraph of the Methods section.
2. Raw data is presented throughout the manuscript.
3. Exact values are mentioned of means/medians etc., and of the  $p$  values. The metrics that are used (e.g. mean or median) are specified whenever confusion could arise.

(For large datasets, or papers with a very large number of statistical tests, you may upload a single table file with tests,  $N$ s, etc., with reference to sections in the manuscript.)

### Group allocation

- Indicate how samples were allocated into experimental groups (in the case of clinical studies, please specify allocation to treatment method); if randomization was used, please also state if restricted randomization was applied
- Indicate if masking was used during group allocation, data collection and/or data analysis

Please outline where this information can be found within the submission (e.g., sections or figure legends), or explain why this information doesn't apply to your submission:

1. Groups are defined (a) by their genotype and (b) upon the strength of the complex spike response to whisker pad air puff stimulation. The latter method for grouping is explained in the Results and Methods sections and illustrated in Figure 3 – Figure supplement 1D-F.
2. Stimulus presentation was randomized whenever possible (applies to the data represented in Figures 2, 7, and 7 Supplement 1). Use of randomization is mentioned in the Results and Methods sections.

### Additional data files ("source data")

- We encourage you to upload relevant additional data files, such as numerical data that are represented as a graph in a figure, or as a summary table
- Where provided, these should be in the most useful format, and they can be uploaded as "Source data" files linked to a main figure or table
- Include model definition files including the full list of parameters used
- Include code used for data analysis (e.g., R, MatLab)
- Avoid stating that data files are "available upon request"

Please indicate the figures or tables for which source data files have been provided:

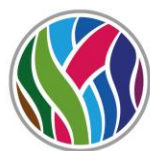

eLIFE

1st Floor  
24 Hills Road  
Cambridge CB2 1JP, UK

P 01223 855340  
W [elifesciences.org](http://elifesciences.org)  
T @elife

Source data files for all box plots are provided, i.e. for Figures 3, 5 and 8 and for Figure supplements 1-S2, 5-S1, 5-S2, 5-S3, 5-S4, 8-S1 and 8-S2.

For this project, no new computer code has been developed. However, computer code can still be obtained upon request.
