# Supplementary material for: Potentiation of cerebellar Purkinje cells facilitates whisker reflex adaptation through increased simple spike activity
Source: eLife journal article supplement (doi:10.7554/elife.38852), 2018-12-18
Supplement: supp [file elife-38852-supp-v1.zip]

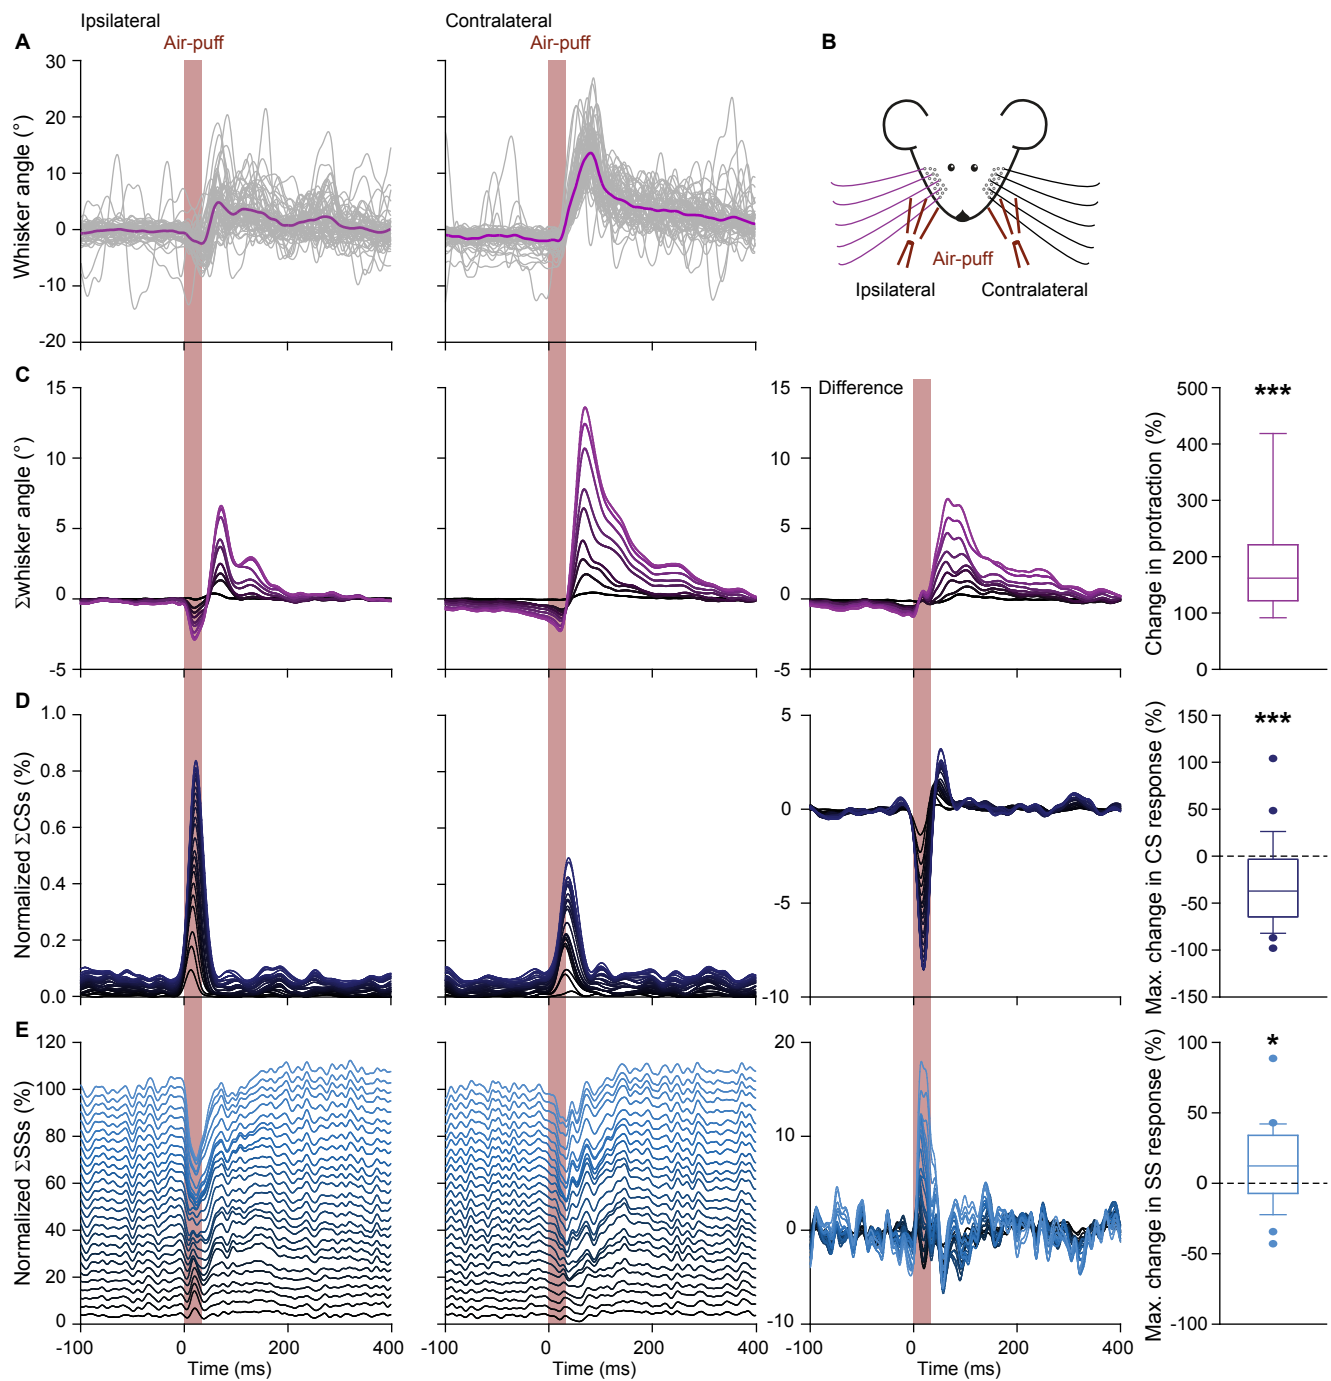

**Figure 5 – figure supplement 3 | Contralateral whisker pad stimulation induces stronger whisker protraction and stronger simple spike responses**  
**A.** Whisker traces of a representative mouse following air-puff stimulation of the ipsilateral (left panel) and contralateral (right panel) whisker pad (see scheme in **B**). Despite a similar strength of stimulation, the protraction of the whiskers was larger upon contralateral stimulation (cf. Figure 1 – figure supplement 2). **C.** Stacked line plots of the averaged whisker traces of 9 mice with the difference

between the contralateral and ipsilateral stimulation depicted in the third column. **D.** Complex spike responses, on the other hand, were more prominent upon ipsilateral stimulation. **E.** The observation that increased simple spike firing correlates to enhanced whisker protraction (cf. Figure 4) was confirmed under these experimental conditions. \*  $p < 0.05$ ; \*\*\*  $p < 0.001$ . See also Data Source File.
