# Supplementary material for: Potentiation of cerebellar Purkinje cells facilitates whisker reflex adaptation through increased simple spike activity
Source: eLife journal article supplement (doi:10.7554/elife.38852), 2018-12-18
Supplement: supp [file elife-38852-supp-v1.zip]

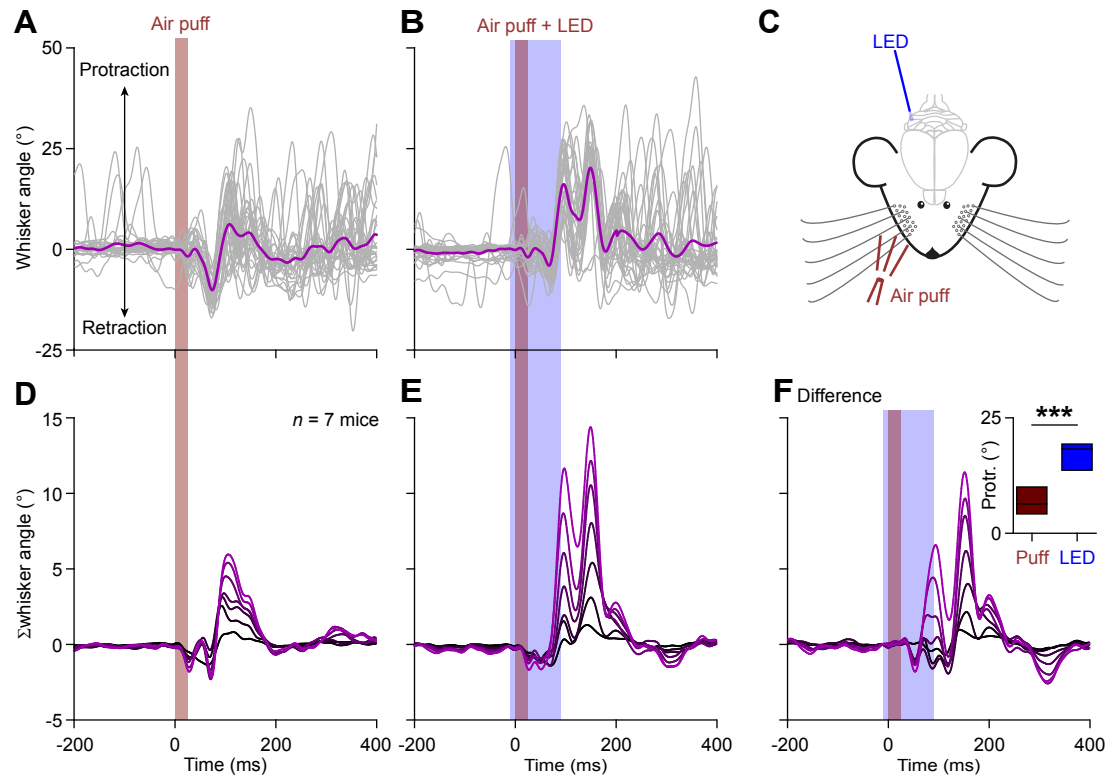

**Figure 5 - figure supplement 4 | Optogenetic stimulation of Purkinje cells increases whisker protraction following air-puff stimulation**

**A.** Air-puff stimulation of the whisker pad induces reflexive touch-induced whisker protraction. **B.** This protraction is enhanced when the sensory stimulus is paired with optogenetic stimulation of PCs. These two panels show whisker traces from a *Pcp2-Ai27* mouse that expresses ChR2 specifically in its PCs. An optic fiber with a diameter of 400  $\mu\text{m}$  was placed on the surface of the cerebellum

centrally at the fissure between crus 1 and crus 2 (**C**). Optogenetic stimulation of these mice results in increased simple spike firing. Stacked line plots of the whisker traces of 7 mice tested in this way following air-puff stimulation alone (**D**) and in combination with PC stimulation (**E**). **F.** The increased PC activity correlated with stronger protraction as evidenced by the differential traces. The inset shows a comparison of the maximal protraction (Protr.) under the two stimulus conditions; \*\*\*  $p < 0.001$  (paired  $t$  test). See also Source Data File.
