# Supplementary material for: Potentiation of cerebellar Purkinje cells facilitates whisker reflex adaptation through increased simple spike activity
Source: eLife journal article supplement (doi:10.7554/elife.38852), 2018-12-18
Supplement: supp [file elife-38852-supp-v1.zip]

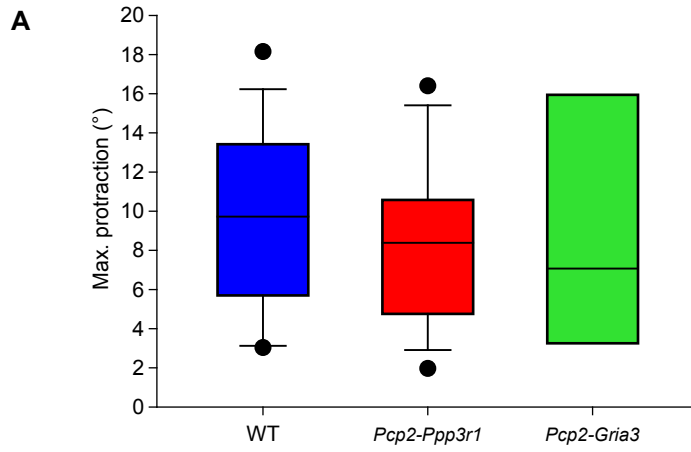

**Figure 8 - figure supplement 2 | Before induction, touch-induced whisker protraction is not affected by *Pcp2-Ppp3r1* and *Pcp2-Gria3* mutations**  
The maximal touch-induced whisker protraction is similar between wild-type ( $n =$

16), *Pcp2-Ppp3r1* ( $n = 13$ ) and *Pcp2-Gria3* ( $n = 6$ ) mutant mice, indicating that the amplitude of the reflex itself is not affected by any of the mutations involved.  $p = 0.860$ ,  $F = 0.152$ , ANOVA. See also Source Data file.
