# Supplementary material for: Potentiation of cerebellar Purkinje cells facilitates whisker reflex adaptation through increased simple spike activity
Source: eLife journal article supplement (doi:10.7554/elife.38852), 2018-12-18
Supplement: supp [file elife-38852-supp-v1.zip]

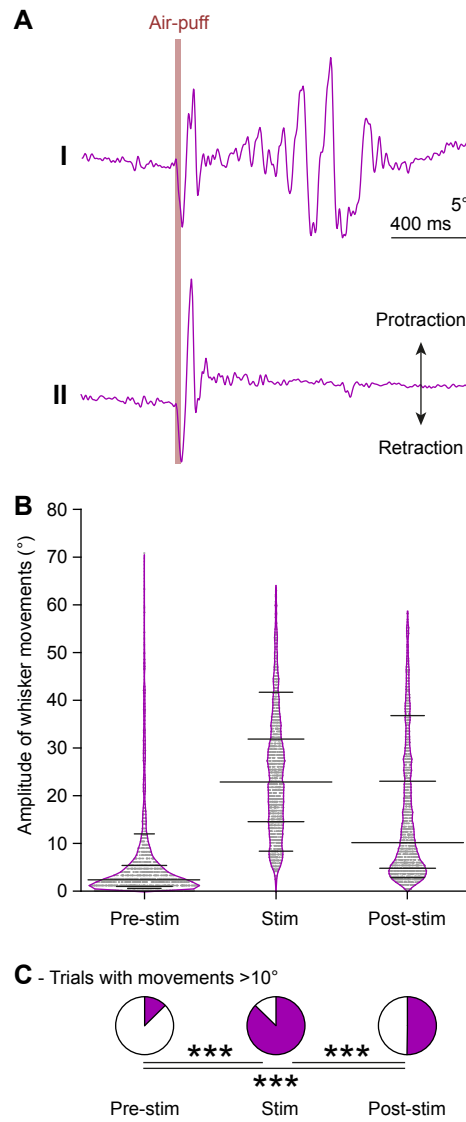

**Figure 1 – figure supplement 1 | Whisker movements are largely restricted to the period after the air-puff**

**A.** During a prolonged period of 0.5 Hz whisker pad stimulation, in roughly half the trials the stereotypic whisker movement – retraction followed by a large active forward sweep – is followed by a prolonged period of more variable whisker movements. The traces show here the whisker movement (averaged over all trackable whiskers) during the two trials marked “I” and “II” in Figure 1D.

**B.** Violin plots showing the amplitudes (difference between maximal retraction and maximal protraction in three 200 ms interval (relative to the start of the air-puff: -200 – 0 ms (Pre-stim), 0 – 200 ms (Stim) and 200 – 400 ms (Post-stim))) of individual trials of 16 mice (with approximately 100 trials per mouse). Horizontal lines represent 10<sup>th</sup>, 25<sup>th</sup>, 50<sup>th</sup>, 75<sup>th</sup> and 90<sup>th</sup> percentiles. **C.** Fractions of trials with movements exceeding 10°. Asterisks indicate significantly different fractions of trials with movement. \*\*\*  $p < 0.001$  ( $\chi^2 = 1470.24$ ; 3x2  $\chi^2$  test).
